# Supplementary material for: Output of Significant Others in the Promotion and Sustainability of Exclusive Breastfeeding Among Nursing Mothers In Ikeduru LGA, Imo State Nigeria:: A Quasi - Experimental Study
Source: Research Square preprint supplement (doi:10.21203/rs.3.rs-6239139/v1), 2025-05-15
Supplement: Supplementary file 1 [file 574d7babf4c58194c677eaf6.docx]

**SUPPLEMENTARY MATERIAL ONE**

**QUESTIONNAIRE ON SOCIODEMOGRAPHIC FACTORS OF PREGNANT WOMEN**

**DEPARTMENT OF PUBLIC HEALTH, SCHOOL OF HEALTH TECHNOLOGY,**

**FEDERAL UNIVERSITY OF TECHNOLOGY, OWERRI**

Dear Respondent,

My name is **Udeh, Mary Ulumma,** a PhD student of the Department of Public Health, Federal University of Technology Owerri. I am conducting a research on “**Prospective Cohort Study on Significant Others and Promotion of Exclusive Breastfeeding in Imo State Nigeria**”. I will appreciate your maximum cooperation in completing this questionnaire. I assure you that every piece of information you provide will be treated with utmost anonymity and confidentiality.

Thank you for your cooperation.

M.U. Udeh

___________________________________________________________________________

**QUESTIONNAIRE-1 (FOR PREGNANT MOTHERS)**

**PROSPECTIVE COHORT STUDY ON SIGNIFICANT OTHERS AND PROMOTION OF EXCLUSIVE BREASTFEEDING IN IMO STATE NIGERIA**

**CODE NO. ----------------------------------**

**SECTION A: SOCIO-ECONOMIC CHARACTERISTICS**

*Instruction:Tick (√) beside the correct options and fill the blank space provided where appropriate.*

1. What is your age as at last birthday (in years)?

1. Below 15[ ] (b) 15-19[ ] (c) 20-24[ ] (d)25-29[ ] (e) 30-34[ ]

(f) 35-39 [ ] (g) 40-44[ ] (h) Others (specify): __________________

1. What is your marital status?

(a) Single [ ] (b) Married [ ] (c)Separated[ ] (d) Divorced [ ] (e)Widowed

1. What is your highest level of education?

(a)No formal education [ ] (b) Primary education [ ]

(c)Secondary education or equivalent [ ] (d) Tertiary education (post- secondary) [ ]

(e) Others (specify): _______________________

1. What is your occupation?

(a)Farming [ ] (b) Public servant [ ] (c) Company/Industry worker [ ]

(d) Trading/Business [ ] (e) Artisan (e.g. hair dresser, fashion designer, etc.)

(f) Others (specify): _______________________

1. What is your income per month (in naira N)?

(a)Below 30,000[ ] (b) 30,000–49,000[ ] (c) 50,000-69,000[ ]

(d)70,000–89,000[ ] (e)90,000-109,000[ ] (f)Others(specify): _____________

1. What is your religion?

(a) Christianity [ ] (b)African Traditional Religion [ ] (c)Islam [ ]

(d) Others (specify): ________________________

**SECTION B: FAMILY RELATED FACTORS/SET UP**

*Instruction: Tick (√) beside the correct options and fill the blank space provided where appropriate.*

1. What is your family type?

(a) Monogamous (you are the only wife of your husband) [ ] (b)Polygamous (your

Husband has one other or more wives) [ ] (c) Not married [ ]

(d) Others (specify): _____________________________

1. Who lives with you in your house (*tick as many as are applicable*)?

(a) You live alone [ ] (b) Your husband [ ] (c)Your husband’s mother [ ] (d)Your husband’s relation(s) [ ] (e) Your mother [ ] (f)Your own relations [ ] (g) Others (specify):______________________________

1. Who will stay with you to care for and your baby after delivery (*omugwo*)?

(a)Your husband [ ] (b) Your mother in-law [ ] (c) Your mother[ ]

(d) Your sister [ ] (e) your sister in-law [ ] (f) Others (specify):______________

1. What is your parity (number of child births you had before this pregnancy)?

(a)None [ ] (b) 1-2 [ ] (c) 3-4 [ ] (d) others (specify):_______________

**SECTION C: PREGNANCY RELATED FACTORS**

10. What is your parity (number of child births you had before this pregnancy)?

(a) None (b) 1-2 (c) 3-4 (d) 5-7 (e) Others (specify): .......

11. What is your gestation period in months (how many months is your pregnancy)?

(a) 1-3 (b) 4-6 (c) 7-9

12. What is your expected date of delivery (EDD) as given by your health personnel?................

13. Have you ever exclusively breastfed your baby (gave your baby only breast milk without any other fluid/feed, not even water for the first six months)?

(a) Yes (b) No (c) I attempted but did not complete the six months

(14) Do you intend to exclusively breastfeed this baby after delivery? (a) Yes (b) No (c) Not sure

Thank you for participating.

**SUPPLEMENTARY MATERIAL TWO**

**QUESTIONNAIRE ON SOCIOECONOMIC CHARACTERISTICS OF SIGNIFICANT OTHERS**

**DEPARTMENT OF PUBLIC HEALTH, SCHOOLOFHEALTHTECHNOLOGY,**

**FEDERALUNIVERSITYOFTECHNOLOGY, OWERRI**

Dear Respondent,

My name is **Udeh, Mary Ulumma,** a PhD student of the Department of Public Health, Federal University of Technology Owerri. I am conducting a research on “**Prospective Cohort Study on Significant Others and Promotion of Exclusive Breastfeeding in Imo State Nigeria**”. I will appreciate your maximum cooperation in completing this questionnaire. I assure you that every piece of information you provide will be treated with utmost anonymity and confidentiality.

Thank you for your cooperation.

M.U. Udeh

___________________________________________________________________________

**QUESTIONNAIRE-2 (FOR SIGNIFICANT OTHERS)**

**PROSPECTIVE COHORT STUDY ON SIGNIFICANT OTHERS AND PROMOTION OF EXCLUSIVE BREASTFEEDING IN IMO STATE NIGERIA**

**SECTIONA: SOCIO-ECONOMIC CHARACTERISTICS**

*Instruction: Tick (√) beside the correct options and fill the blank space provided where appropriate.*

1. What is your age as at last birthday (in years)?
2. 21-30 [ ] (b) 31-40 [ ] (c) 41-50 [ ] (d) 51-60 [ ] (e) Others (specify): ____________
3. What is your sex? (a) Male [ ] (b)Female [ ]
4. What is your marital status?

(a)Single [ ] (b) Married [ ] (c) Separated [ ] (d) Divorced [ ] (e) Widowed

1. What is your highest level of education?

(a)No formal education [ ] (b) Primary education [ ]

(c) Secondary education or equivalent [ ] (d) Tertiary education (post- secondary) [ ]

(e) Others (specify): _______________________

1. What is your occupation?

(a)Farming [ ] (b) Public servant [ ] (c) Company/Industry worker [ ]

(d) Trading/Business [ ] (e) Artisan (e.g. mechanic, electrician, tailor, driver etc.)

(f) Others (specify): _______________________

1. What is your income per month (in naira N)?

(a) Below30000 [ ] (b) 30,000 – 49,000[ ] (c) 50,000-69,000 [ ]

(d)70,000–89,000 [ ] (e) 90,000-109,000 [ ] (f) Others (specify): _______________

1. What is your religion?

(a) Christianity [ ] (b)African Traditional Religion [ ] (c) Islam [ ]

(d)Others (specify): ________________________

1. What is your relationship with the pregnant mother?

(a)Husband [ ] (b) Motherin-law [ ] (c) Mother[ ]

**SECTIONB: KNOWLEDGE OF EXCLUSIVE BREASTFEEDING**

*Instruction: Tick (√) to indicate the correct options in the spaces provided*

1. What is exclusive breastfeeding?

(a) Feeding baby with breast milk and also giving baby water in the first six months of life [ ] (b) Feeding baby with breast milk and also giving baby artificial milk [ ]

(c)Feeding baby with only breast milk in the first six months of life without adding any other

feed not even water except for medically prescribed vitamin supplements[]

(d) Not giving new born baby the mother’s breast milk [ ]

10. When is the right time after delivery to introduce the new born baby to breastfeeding?

(a)Within the first one hour afterbirth [ ] (b) After the first one hour of child birth but within

the first 24hours [ ] (c) On the 2nd day of delivery [ ] (d) On the 3rd day of delivery [ ]

11. The first yellow milk produced by the breast after child birth (colostrum) is ------------?

(a)Nutritious to the new born baby [ ] (b) Dangerous to the health of the new born baby [ ]

(c) Not fit for consumption [ ] (d) Better thrown away [ ]

12. Feeding the new born with only breast milk in the first six months of life is adequate because

it contains all the nutrients the baby needs in food during this period.

(a) True [ ] (b) False [ ]

13. Babies fed only on breast milk in their first six months of life do not get sick easily.

(a) True [ ] (b) False [ ]

14. Babies fed only on breast milk in their first six months of life are very intelligent.

(a) True [ ] (b) False [ ]

15. Babies fed only on breast milk in their first six months of life do not need additional water

during that period. (a) True [ ] (b) False [ ]

16. Breastfeeding the baby in the first six months without any addition can help the nursing mother

space pregnancy.(a) True [ ] (b) False [ ]

17. Breastfeeding the baby in the first six months without any addition can help the nursing mother

prevent certain unhealthy conditions such as excess fat and cancer. (a) True [ ] (b) False [ ]

18. Breastfeeding the baby in the first six months without any addition can help the family save

Money that would have been used to purchase other baby feeds. (a) True [ ] (b) False [ ]

**SECTIONC: ATTITUDE TOWARDS EXCLUSIVE BREASTFEEDING**

*Instruction: Tick (√) to indicate the correct options in the spaces provided*

| **S/N** | **Attitudinal Statement** | **StronglyAgree**  **(SA)** | **Agree**  **(A)** | **Disagree**  **(D)** | **Strongly**  **Disagree**  **(SD)** |
| --- | --- | --- | --- | --- | --- |
| 19 | Every mother should be able to give her new born baby only breastmilk without any other fluid (not even water) for the first six months of life |  |  |  |  |
| 20 | It is a thing of pride for a nursing mother to give only breast milk to her baby in the first six months after delivery |  |  |  |  |
| 21 | Time spent in breastfeeding the infant is not a wasted time |  |  |  |  |
| 22 | I don’t care about breast sagging when it comes to breast feeding my baby |  |  |  |  |
| 23 | Nothing stops a working mother from breast feeding on demand without giving even water to the infant for the first six months of life |  |  |  |  |
| 24 | Every member of the family should encourage the breastfeeding of infant in the first six months of life without giving water |  |  |  |  |
| 25 | A nursing mother should sleep with her new born especially in the first six months |  |  |  |  |
| 26 | There is nothing to be ashamed of in bringing out the breast to breastfeed the infant in public |  |  |  |  |
| 27 | I will proudly showcase my infant as a baby fed only on breast milk for the first six months of life |  |  |  |  |
| 28 | I will whole heartedly support family and friends to breastfeed infants without any addition not even water for the first six months after child birth |  |  |  |  |

**SECTION D: PERCEPTION TOWARDS EXCLUSIVE BREASTFEEDING**

*Instruction: Tick (√) to indicate the correct options in the spaces provided*

| **S/N** | **Perception Statement** | **StronglyAgree**  **(SA)** | **Agree**  **(A)** | **Disagree**  **(D)** | **Strongly**  **Disagree**  **(SD)** |
| --- | --- | --- | --- | --- | --- |
| 29 | Breastfeeding your infant/baby with only breast milk for the first six months of life is a good practice of infant feeding |  |  |  |  |
| 30 | Breastfeeding your infant/baby with only breast milk for the first six months of life will not make the child reject other family meals later |  |  |  |  |
| 31 | Breastfeeding your infant/baby with only breast milk for the first six months of life will protect the baby against infectious diseases at that period |  |  |  |  |
| 32 | Breastfeeding your infant/baby with only breast milk for the first six months of life is economically beneficial to the family |  |  |  |  |
| 33 | Breastfeeding your infant/baby with only breast milk for the first six months of life is not more time demanding than doing other wise |  |  |  |  |
| 34 | Breastfeeding your infant/baby with only breast milk for the first six months has the advantage of being a birth spacing method |  |  |  |  |
| 35 | Children who were fed with only breast milk for the first six months of life behave well |  |  |  |  |
| 36 | Children who were fed with only breast milk for the first six months of life have higher intelligent quotient than others |  |  |  |  |
| 37 | Breastfeeding your infant/baby with only breast milk for the first six months of life results in greater family bonding |  |  |  |  |
| 38 | The breasts of a woman will eventually sag whether she breastfeeds a child or not |  |  |  |  |

**SECTIONE: CUES TOACTION**

*Instruction: Tick (√) to indicate the correct options in the spaces provided*

39. Do you know of anyone who breast fed her baby without giving water or any other fluid/feed

for the first six months after delivery?

(a)Yes [ ] (b)No [ ] (c)Not sure[ ]

40. Has any of your family members breast fed her baby without giving water or any other fluid/feed

For the first six months after delivery?

(a)Yes [ ] (b) No [ ] (c)Not sure[ ]

41. Have you ever heard of exclusive breastfeeding?

(a)Yes [ ] (b) No [ ] (c)Not sure[ ]

42. Have you ever attended any seminar/workshop on exclusive breastfeeding?

(a)Yes [ ] (b)No[ ] (c)Not sure[ ]

**Thank you for participating.**

**SUPPLEMENTARY MATERIAL THREE**

**DEPARTMENT OF PUBLIC HEALTH, SCHOOL OF HEALTH TECHNOLOGY,**

**FEDERAL UNIVERSITY OF TECHNOLOGY, OWERRI**

**CHECK LIST MONITORING EBF**

**CODE NO. ----------------------------------**

**DATE OF DELIVERY-------------------------------- TIME OF DELIVERY ------------------**

**FACILITY/PLACE OF DELIVERY -----------------------------------------**

**RELATIONSHIP WITH SIGNIFICANT OTHER ------------------------------------**

**WEEK 1**

| **DAY**  **DATE** | **1** | **2** | **3** | **4** | **5** | **6** | **7** |
| --- | --- | --- | --- | --- | --- | --- | --- |
| **Skin to Skin** |  |  |  |  |  |  |  |
| **Initiation of breastfeeding within 1st hour** |  |  |  |  |  |  |  |
| **Fed colostrum** |  |  |  |  |  |  |  |
| **Rooming in** |  |  |  |  |  |  |  |
| **Fed baby on demand** |  |  |  |  |  |  |  |
| **Breastfed at night** |  |  |  |  |  |  |  |
| **Gave baby water** |  |  |  |  |  |  |  |
| **Gave baby medicinal herbs/root** |  |  |  |  |  |  |  |
| **Gave baby infant formula** |  |  |  |  |  |  |  |
| **Fed baby with feeding bottle** |  |  |  |  |  |  |  |
| **Fed baby with spoon and plate/cup** |  |  |  |  |  |  |  |
| **Sign:** |  |  |  |  |  |  |  |

**SUPPLEMENTARY MATERIAL FOUR**

TRAINING MANUAL FOR PROSPECTIVE COHORT STUDY ON SIGNIFICANT OTHERS AND PROMOTION OF EXCLUSIVE BREASTFEEDING IN IKEDURU LGA, IMO STATE NIGERIA

**Capacity building Training Manual**

**Encounter One**

**Topic:** ABC of Breastfeeding, Breast milk and Exclusive Breastfeeding

**SubTopics**

- Breast Milk and its contents/constituents
- Meaning of Breast Feeding
- Meaning of Exclusive Breast Feeding (EBF)
- Benefits of EBF, importance of EBF and risks of not exclusively breastfeeding
- Meaning of Colostrums
- Latching (positioning Baby)

**Objectives of the Topic**: 1. Training the significant others on Meaning, Benefits and Importance of Breastfeeding

2. Training on the meaning of colostrums, EBF and its importance

3. Highlights on challenges of breastfeeding and way forward

**Duration:** 2 hours 30 minutes (21/2)

Twenty minutes for each subtopic and 30 minutes for interactive and question and answer session.

**Instructional Materials:** Picture of a woman latching her baby and a doll baby to demonstrate latching

**Contents of the topic**

**"Breastmilk**: the ideal perfect food containing all nutrients perfectly balanced for life giving, "At the beginning of their walk here on earth, the most important nurturing, nourishing protection that they need is (Breastmilk)."

It is considered Mother Nature's vaccine as it gives the foundation for the future of the baby. Breast milk (sometimes spelled as breastmilk) or mother's milk is [milk](https://en.wikipedia.org/wiki/Milk" \o "Milk) produced by [mammary glands](https://en.wikipedia.org/wiki/Mammary_gland" \o "Mammary gland) located in the [breast](https://en.wikipedia.org/wiki/Breast" \o "Breast) of a human [female](https://en.wikipedia.org/wiki/Female" \o "Female). Breast milk is the primary source of nutrition for [newborns](https://en.wikipedia.org/wiki/Newborn" \o "Newborn), containing fat, protein, carbohydrates ([lactose](https://en.wikipedia.org/wiki/Lactose" \o "Lactose) and [human milk oligosaccharides](https://en.wikipedia.org/wiki/Human_milk_oligosaccharide" \o "Human milk oligosaccharide)) and variable minerals and vitamins.  Breast milk also contains substances that help protect an infant against infection and inflammation, whilst also contributing to healthy development of the immune system and gut microbiome.

**"Breastfeeding** is an enriching and learning experience that teaches patience, closeness, giving full attention and warmth. A true sense of love and affection develops a loving bond and a feeling that has been described as being "One in Spirit".

**Breastfeeding Benefits for individuals, Community and Nation**

**Protection**... "The mother shelters and protects the baby with her breastmilk. The father and extended family protect the mother/child relationship through support and caring..."

**Strength**... "A community and nation that takes the responsibilities of breastfeeding seriously, that honors and respects the needs of the birthing women to have the time and support they need in order that breastfeeding is established, is a nation that cares about the long term health of its people (Carol Couchie, 2013).

**Meaning of Breastfeeding**

Breastfeeding : Breastfeeding, also called nursing, is the process of feeding a mother's breast milk to her infant, either directly from the breast or by expressing (pumping out) the milk from the breast and bottle-feeding it to the infant. Breastfeeding and breast milk provide an infant with calories and nutrients, including macronutrients (fat, protein, and carbohydrates) and micronutrients (vitamins and minerals).

**Importance of Breastfeeding**

- Breastfeeding offers health benefits to mother and child even after infancy. These benefits include
- Proper heat production and adipose tissue development,
- A 73percent decreased risk of [sudden infant death syndrome](https://en.wikipedia.org/wiki/Sudden_infant_death_syndrome" \o "Sudden infant death syndrome), increased [intelligence](https://en.wikipedia.org/wiki/Intelligence" \o "Intelligence), decreased likelihood of contracting [middle ear infections](https://en.wikipedia.org/wiki/Middle_ear_infections" \o "Middle ear infections), cold and [flu](https://en.wikipedia.org/wiki/Flu" \o "Flu) resistance,
- A tiny decrease in the risk of [childhood leukemia](https://en.wikipedia.org/wiki/Childhood_leukemia" \o "Childhood leukemia),
- lower risk of childhood onset [diabetes](https://en.wikipedia.org/wiki/Diabetes" \o "Diabetes), In addition, feeding an infant breast milk is associated with lower insulin levels and higher leptin levels compared feeding an infant via [powdered-formula](https://en.wikipedia.org/wiki/Infant_formula" \o "Infant formula). Many of the infection-fighting and immune system related benefits are associated with [human milk oligosaccharides](https://en.wikipedia.org/wiki/Human_milk_oligosaccharide" \o "Human milk oligosaccharide).
- Decreased risk of [asthma](https://en.wikipedia.org/wiki/Asthma" \o "Asthma) and [eczema](https://en.wikipedia.org/wiki/Eczema" \o "Eczema), decreased [dental problems](https://en.wikipedia.org/wiki/Dental_problems" \o "Dental problems),
- Decreased risk of [obesity](https://en.wikipedia.org/wiki/Obesity" \o "Obesity) later in life,
- Decreased risk of developing [psychological disorders](https://en.wikipedia.org/wiki/Psychological_disorders" \o "Psychological disorders), including in [adopted](https://en.wikipedia.org/wiki/Adoption" \o "Adoption) children.  **Breastfeeding also provides health benefits for the mother**
- It assists the uterus in returning to its pre-pregnancy size and reduces post-partum bleeding, through the production of Oxytocin. Breastfeeding can also reduce the risk of [breast cancer](https://en.wikipedia.org/wiki/Breast_cancer" \o "Breast cancer) later in life.  Lactation may also reduce the risk for both mother and infant from both types of diabetes.  Lactation may protect the infant from specifically developing Type 2 diabetes, as studies have shown that bioactive ingredients in human breast milk could prevent excess weight gain during childhood via contributing to a feeling of energy and satiety. A lower risk of child-onset diabetes may be more applicable to infants who were born from diabetic mothers. The reason is that while breastfeeding for at least the first six months of life minimizes the risk of Type 1 diabetes from occurring in the infant, inadequate breastfeeding in an infant prenatally exposed to diabetes was associated with a higher risk of the child developing diabetes later. However, it can be argued that human breastfeeding may contribute to protective effects against the development of Type 1 diabetes because the alternative of bottle-feeding may expose infants to unhygienic feeding conditions (CDC, 2020)

**Exclusive Breast Feeding (EBF)**

Exclusive breastfeeding (EB) means that an infant receives only breast milk from his or her mother or a wet nurse, or expressed breast milk, and no other liquids or solids, with the exception of oral rehydration solution, drops or syrups consisting of vitamins, minerals supplements or medicines.

The World Health Organization (WHO) recommends EB until the age of six months, and then to start adequate and safe complementary feeding of other liquids and foods, with continued breastfeeding up to 2 years of age or beyond.

**Importance of Exclusive Breastfeeding**

## Breast milk is all your baby needs for the first six months of life

- Babies need no other food or fluid, including water.
- Introducing other food or fluids can cause problems for breastfeeding and your baby’s health.
- Babies who have only breast milk for six months get sick less often than babies who eat other foods. They have less pneumonia and other respiratory illnesses
- They also have less intestinal disease, fewer ear infections and fewer allergies.

## The early months of your baby’s life are essential to long-term development

- Breastfeeding gives your baby the body-building components that are particularly suited to his or her health and development.
- Milk from animal and plant sources do not contain the body-building components particularly suited to the human body.

## Meaning of Colostrums and its Importance

## The first milk is colostrums. Colostrums is in the pregnant mothers breasts starting about the fifth month of pregnancy.

- Colostrum is available in small amounts which perfectly match your baby’s stomach size at birth.
- Breast milk begins to be produced when your baby is born, and increases in amount daily, as your baby’s stomach size grows.
- Small amounts of colostrum in the first few days keep your baby from overfilling his or her stomach. This is important while your baby is learning to coordinate sucking, swallowing and breathing.
- Colostrum gives your baby protection against disease that no formula can give.
- A baby receives colostrums from the mother if put to breast from immediately after birth to three days after birth
- It is used over the first few days while your baby’s stomach is too small to accommodate much fluid.
- The weight loss your baby will normally experience in the first few days is simply the loss of “water weight.”
- Breast milk has all the nutrition and fluid your baby needs for the first six months, even in hot weather. Breast milk is better for your baby than any other food or fluid. Giving other foods of fluids may decrease your baby’s desire for your breast milk.
- Your baby’s body has iron stored from your body during pregnancy. Your breast milk has a protein that makes your baby’s body able to use that iron.

## Risks of not exclusively breastfeeding

## Babies are not ready to take other foods until 6 months of age because for the first six months of life, your baby’s intestine has small pores in it like a net. If given other foods, nonhuman proteins can go through the pores into your baby’s body and cause allergies. Around 6 months of age, the pores in your baby’s intestine close up. Your baby can then eat other foods.

- Around 6 months of age, your baby is able to sit up. A baby must be able to sit up to swallow food properly.
- Around 6 months of age, your baby’s tongue can move in to accept food, unlike during breastfeeding when the tongue pushes out.
- By 6 months of age, the baby’s mouth cavity has deepened. Your baby can then eat spoonfuls of food.

Important fats found only in breast milk build the brain, eyes and digestive system. The brain and nervous system grow a lot over the first year or two. The amount of fat in your milk grows over this time. Breastfeeding through the second year helps your baby develop a better brain, eyesight, and develop a digestive system that more efficiently absorbs nutrients( [American Academy of Pediatrics](https://en.wikipedia.org/wiki/American_Academy_of_Pediatrics" \o "American Academy of Pediatrics) , 2021) .

**Latching (positioning baby)**

Latching on is how your baby attaches to your breast to feed. Lots of people think and assume that it comes naturally but in reality it’s more of a skill that you and your baby needs to learn together because good attachment helps prevent sore cracked nipples. Therefore it’s important to get it right.


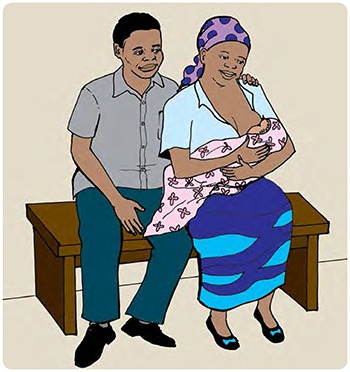


Figure one: picture showing a husband supporting his while breastfeeding

WHO, (2018).

###

### REMINDER

Correct breastfeeding positioning occurs when the baby's:

- head and whole body are well supported and held close to mother
- face and stomach face the mother
- Ear and shoulder are in one straight line, neck is not twisted.

Good attachment occurs when the baby's:

- mouth covers most of areola (dark part of the nipple) with some of the areola visible above the mouth
- mouth is wide open
- chin touches the breast
- Lower lip is turned outwards.

Effective suckling occurs when:

- slow, deep firm sucks alternate with bursts of suckling
- No other sounds except swallowing sounds are heard.

**Summary**

By the end of this session you should be able to:

1. Communicate the advantages and benefits of Exclusive breastfeeding for both mother and baby
2. Demonstrate how to breastfeed a baby, including positioning and attachment

**Evaluation**

1. What is the meaning of Exclusive Breastfeeding?
2. What is colostrums and when can a baby receive it?

**Assignment**

Go home and step down all we’ve learnt today to your pregnant mothers and report back all questions and challenges in our next session.

**Encounter Two**

**Topic**

Promotion of EBF practice

**SubTopics**

- Skills for Promotion of Exclusive Breast Feeding practice
- Supporting Exclusive Breastfeeding
- Advantages of Breastfeeding
- How to encourage EBF practice, support for feeding preterm or low birth weight babies, support for exclusively breastfeeding twins, support for HIV positive mothers
- Breastfeeding , Challenges and way forward

**Objectives of the Topic**

- To learn the skills and acts that will help to promote EBF
- To explain the opportunities for HIV-infected mothers to breast feed and improve HIV-free survival of their baby

**Duration:** 2 hours 30 minutes (21/2). Twenty four minutes for each subtopic and 30 minutes for interactive and question and answer session.

**Instructional Materials:** No instructional material was used.

**Contents**

**Promotion of EBF (Things to do to promote EBF)**

Women may need some help to successfully feed their babies. They need support and reassurance as they learn this skill breastfeeding

- Stay together after the birth
- Keeping your baby with you after the birth will promote a feeling of closeness and a strong hormonal response that is linked with breastfeeding success.  In many cases it is even possible to have your baby with you immediately after a caesarean birth.
- Initiating Breastfeeding within first hour of birth and giving of colostrum
- Get your position and attachment right: The first few days after the birth offer the best opportunity for you and your baby to learn to breastfeed. Your breasts are still soft for a few days after the birth, then as breast milk changes from highly nutritious colostrum to mature milk, your breasts can become quite full and ﬁrm. Try and use the first few days to get your position and attachment right, this may help to avoid potential problems down the track.
- Be patient: Breastfeeding is a skill that both you and your baby are learning and for some mothers and babies it is harder than it is for others. Like anything new, it takes time and patience. Relaxation is important for both you and your baby. If you find your nursing mother getting frustrated or angry at herself while she’s trying to breastfeed, tell her to stop and try again in a little while. If the baby is distressed, and if it is possible, ask someone to keep them distracted until your nursing mom is ready to try again. You can also encourage her to express for this feed and try feeding from the breast for the next feed.
- Feed on demand or according to need: While you are establishing your breastfeeding your baby will feed between seven and twelve times in 24 hours. This will settle over time. Frequent and effective feeding will help you to make enough milk for your baby.
- Keep baby in the room with you: There are many benefits to having your baby in the room with you in the hospital and at home; including that it reduces the risk of sudden infant death. It also promotes breastfeeding. Having your baby in the same room as you will help you to recognise when your baby is hungry, tired or in need of a cuddle; it will make it easier for you to know when your baby is ready to feed. It is important to provide a safe sleep environment for your baby night and day.
- Breastfeed at Nights
- Avoid teats, dummies, and complementary feeds: Because your new baby is still learning to breastfeed, they can become confused if they are offered a teat or dummy. If your baby has ﬂuids other than breast milk they will breastfeed less, and your breast milk supply will decrease. Frequent, unrestricted suckling at the breast will satisfy your baby and ensure that your milk supply continues to meet your baby’s needs.
- Ensure you feed your baby Breast milk only without the addition of any other fluid not even water for the first six months. When babies are exclusively breastfed, they need no other food or drink until at least six months of age. You can be confident that your baby is receiving enough breast milk in the early weeks if they have six or more heavy, wet nappies and at least one bowel motion a day. It’s also a good sign if your baby settles after most feeds.

### Initiating skin-to-skin contact and breastfeeding

After birth and cleaning of the baby, advice your nursing mothers to Place him/her (baby) on her chest, preferably with skin-to-skin contact, the nursing mother can also remind the nurses to help her place the baby on her chest for at least 30-60 minutes. A blanket can be used to cover both baby and the mother, to keep the baby warm. When the baby seems ready, encourage the mother to help the baby to her breast. Babies show they are ready to take the breast when they start “rooting”, or looking for the breast. Some babies need encouragement to latch-on at this stage.

It is important for all mothers to start skin-to-skin contact from birth as soon as possible following birth preferably in the first hour. They should let their baby suckle when they appear to be ready. Some babies may take longer to start breastfeeding. A health worker also has an important role in helping the mother to do this. Early contact will help a mother to bond with her baby, that is, to develop a close, loving relationship. It also makes it more likely that she will start to initiate breastfeeding.

### SKIN-TO-SKIN CONTACT HELPS

- to keep the baby warm
- to establish breastfeeding
- to encourage mother-child bonding.
- Helps to initiate breastfeeding

### Encourage and support women as they learn to breastfeed

Observe the mother breastfeeding her baby and offer help and assistance if needed. Look for signs of good attachment and effective suckling (slow deep sucks with pauses). If the attachment is not good, encourage the mother to reposition the baby. Show the mother how to take the baby off the breast, by inserting her little finger into the corner of the baby's mouth. Keep encouraging and reassuring the mother the whole time. Encourage her to reposition the baby until she feels comfortable and the baby is sucking well. Reassure her that there is no need to rush, even if the baby is crying.

### Advantages of Breastfeeding

- Breast milk provides all the nutrients that a baby needs for the first six months of life to grow and develop.
- Breast milk continues to provide high-quality nutrients and helps protect against infection up to two years of age or more.
- Breast milk protects babies from infections and illnesses.
- Babies find breast milk easy to digest.
- The baby's body uses breast milk efficiently.
- Breastfeeding can contribute to birth spacing.
- Breastfeeding helps the mother's uterus to contract reducing the risk of bleeding after birth.
- Breastfeeding lowers the rate of breast and ovarian cancer in the mother.
- Breastfeeding promotes a faster return to mother's pre-pregnancy weight.
- Breastfeeding promotes the emotional relationship, or bonding, between mother and infant.

As well as benefits for the baby in terms of survival, breastfeeding has other advantages. It is environmentally friendly, cheapest, safe, affordable, readily available and nutritionally complete. It is easier to carry out than feeding formula; it takes no preparation; is always at the correct temperature, it is always clean and is always available. It is the perfect nutrition for babies.

### REMINDER

To encourage and support exclusive breastfeeding there are key things you can do:

### Breastfeed soon after your baby is born

1. Encourage breastfeeding frequently, day and night, and advise the mother to allow the baby to feed for as long as he/she wants. Tell her it is quite normal for a baby to feed up to eight times a day. Explain to her the signs a baby will show when he/she needs to be fed (such as “rooting”, looking for the nipple, sucking on the hand).
2. Reassure the mother that there is no need to give the baby any other drink or food, not even water breast milk has all a baby needs.
3. Help the mother whenever she needs assistance and especially if she is a first time or adolescent mother or a mother with other special needs.
4. Explain to the mother she should let the baby finish the first breast and come off on its own before offering the second breast.
5. Encourage the mother to start each feed with a different breast. For example, if the left breast is used to start one feed, at the next feeding start with the right breast.
6. If it is necessary to express breast milk, show the mother how to do this and show her how to feed expressed breast milk by cup. You may need to refer her to a trained infant feeding counsellor for this.
7. Reassure the mother that her body will make enough breast milk to satisfy her baby's needs. Just because a baby is crying, it does not mean that she does not have enough breast milk. A baby who is demanding more breast feeds may be growing. By allowing the baby to suckle more often, her body will produce more breast milk to meet her baby's needs.
8. Explain that the mother can provide all the breast milk her baby needs for the first 6 months and beyond.
9. Explain that the mother can continue breastfeeding if she has to return to work or school, either by expressing breast milk or feeding more often when she is at home.
10. Advise her to seek help (or come back to see you) if the baby is not feeding well or if she has any difficulties or concerns with breastfeeding, sore nipples or painful breasts. If needed, refer her to a trained infant feeding counsellor.

**Supporting Breastfeeding**

Women need extra support, encouragement and reassurance while breastfeeding. Although we view breastfeeding as a natural process, it is still a skill that has to be learned. Initially breastfeeding can seem demanding, as the baby may have a desire to feed/suck frequently. Babies however, begin to establish their own pattern over time, and the mother will begin to feel more comfortable and at ease.

Some women also find that the initial ‘let down’ reflex is very strong which causes them pain or they get strong after-pains as their wombs contract. Reassure them that this will pass. The ‘let down’ reflex may also cause them to leak milk when they have sexual intercourse. Reassure them that this is normal and that they may need to tell their husband or partner that this is normal.

Sometimes husbands or partners may feel excluded from the breastfeeding process. Encourage them to be involved in other ways. This may ease the situation and help men to provide more support for breastfeeding; for example, by asking him to fetch the baby for the feed, helping make the woman comfortable, or looking after the other children while she is feeding. Massaging the baby, and humming to calm a crying baby are other very useful ways of involving men.

### Support for feeding preterm and/or low birth weight babies

Low birth-weight or preterm babies should be fed their mother's own breast milk. The mother may need extra support to initiate breastfeeding or expressing breastmilk as soon as possible after birth. Because low birth-weight babies can sometimes get easily tired when feeding, it is particularly important that the mother feeds her baby as often as possible, responding to demand and at least 8 feeds during 24 hours, during the day and night

If a mother cannot feed her own baby, it is still best for a low birth-weight baby to be fed human breast milk. Another woman could feed the baby, so long as she is not HIV-infected.

### Support for breastfeeding twins

Many mothers who give birth to two or more babies are worried they will not have enough milk. Reassure her that she will have enough milk for both babies. Encourage the mother to feed one baby at a time until breastfeeding is established. If one twin is weaker or smaller than the other, make sure that the weaker twin also gets enough milk.

## Mothers who are HIV-positive

Babies of HIV-positive mothers can benefit from breastfeeding for all the same reasons outlined above. HIV may pass from an HIV-infected mother to her baby during pregnancy, childbirth and breastfeeding. Antiretroviral treatments can dramatically reduce the risk of mother-to-child transmission during breastfeeding and increase the chance of HIV-free survival of the baby (that is, staying free of HIV infection and also staying alive). Although there is still a small chance that the baby could become HIV positive even when the mother is being treated with antiretroviral drugs, babies who are not breastfed, but given replacement feeds, are more likely to die from infections.

Women who are HIV-positive and plan to breastfeed need support, particularly in the early stages when breastfeeding is being initiated. Try to help the women to avoid getting mastitis or nipple damage, as these difficulties increase the risk of transmission to the baby. Advise the nursing mother to return to the health center if she has any problems with her breasts.

### WHO RECOMMENDATIONS FOR INFANT FEEDING FOR HIV-POSITIVE WOMEN

Mothers known to be HIV positive should be provided with lifelong antiretroviral therapy or antiretroviral prophylaxis (preventative treatment) to reduce HIV transmission to the baby during pregnancy, childbirth and breastfeeding.

In settings where the national authorities recommend breastfeeding, HIV infected mothers and/ or their babies should be given antiretroviral treatment or prophylaxis to reduce the risk of transmission throughout the breastfeeding period.

These mothers should exclusively breastfeed their babies for the first 6 months of life, then introduce appropriate complementary foods with continued breastfeeding for the first 12 months of life. Mothers should stop breastfeeding only when they can provide a safe and adequate diet.

If a mother decides to stop breastfeeding, she should do so gradually within one month.

HIV infected mothers should only give commercial infant formula milk as a replacement feed to their baby when specific conditions of safety and hygiene, affordability and supply of formula, access to health care and family support for replacement feeding are met (WHO, 2010)

## How Can Parents Living with HIV Breast/Chestfeed Their Babies Safely?

You are the only person who should decide how your baby will be fed.

If you choose to breast/chestfeed yourself, here are some tips to help you do so safely:

- Take your HIV drugs exactly as prescribed ([adherence](https://www.thewellproject.org/hiv-information/adherence-0)). This will keep the amount of virus in your blood low and make it far less likely that your baby will acquire HIV. Your health care provider may test your viral load more often while you are breast/chestfeeding.
- Make sure your infant gets their doses of HIV drugs as well. If you are breast/chestfeeding, additional drugs may be prescribed for the baby, and additional testing may be recommended.
- Do your best to breast/chestfeed exclusively (no other forms of nutrition for the baby) for six months recognizing that there may be reasons to temporarily use formula, such as not having enough pumped milk when a caregiver needs it. It is a good idea to avoid giving the baby solid foods before six months of age.
- Take good care of your breasts. Try to avoid engorgement, mastitis, and cracked nipples.
- Find people who will help you to manage the stress of taking care of an infant, healing your own body after birth, breast/chestfeeding, and dealing with your HIV.
- Some women also feel very sad after having a baby (called "postpartum blues" or, in more severe cases, postpartum depression). Seek help if you feel this way.
- Ask knowledgeable people in your community or professionals, such as lactation consultants, for advice on some of the challenges you may experience while breastfeeding, including cracked or sore nipples, or a baby who has difficulty nursing.
- Teach the pregnant mother to take good care of her own health. Make sure you get enough healthy food and drink plenty of (clean) water. Breastfeeding is tiring, so get enough rest.

**Evaluation**

- 1. State any five things you can advise your pregnant mother to do in other to encourage and promote EBF practice?
  2. What can a HIV positive mother do for her to safely breastfeed her baby exclusively?

**Assignment**

- Communicate information on the advantages of breastfeeding (including health benefits, economic benefits, etc.), to help women decide which method of feeding they will choose. Be sure to also discuss the risks of not breastfeeding. Answer any questions or concerns the woman may have. For example, some women do not realize that it is normal for the baby to lose weight in the first three or four days after birth and that this is not a reflection of how she is breastfeeding or the quality of her breast milk. Women can still breastfeed while taking most medications, such as antibiotics, antiretroviral or TB medication.
- All mothers should be encouraged to exclusively breastfeed their babies until they are six months old. Exclusive breastfeeding means that the baby is not given any other food or drink, not even water. They are only given breast milk.

**Encounter Three**

Topic: Activities to Support Breastfeeding

Sub Topics

**Breastfeeding linkage**

1. **Can you see your wife, daughter or daughter in law in this picture**
2. I can,
3. My feelings,
4. Loss of freedom:
5. Will breastfeeding tie me down?
6. Engorgement: a demonstration with a balloon
7. The eating patterns game

## Objective: To build their capacity on EBF promotion using real life linkages.

## Instructional materials: balloons, wallet, measuring tape, garbage bag, thermometer

## Duration: Two and half hours, 17 minutes for each game and 30 minutes for interaction and question and answers.

#### Activity 1: Breastfeeding Linkages

This activity helps participants learn about the importance of breastfeeding and provides an opportunity to discuss the risks of formula feeding. Collect objects that represent the importance of breastfeeding/risk of formula feeding and place in a basket or bag. Have each participant pick an object from the bag and tell the group about the object's link or connection with breastfeeding.

**Examples**:

- Wallet - breastfeeding saves money
- Tape measure - breastfeeding helps mother lose weight that she gained during pregnancy
- Tooth brush - breastfeeding promotes healthy tooth and jaw development
- Garbage bag - breastfeeding is environmentally friendly
- Picture of ear or otoscope - breastfeeding protects against ear infections
- Thermometer - breastfed children have fewer illnesses
- Report card - breastfed children have higher IQ
- Sanitary pad - mothers who breastfeed have less risk of hemorrhage
- Picture of a heart - breastfeeding promotes bonding
- Immunization card or vaccine packaging - breastfed babies have more antibodies and a heightened response to immunization
- Pregnancy test kit - for some women breastfeeding may delay the return of fertility (Note: be sure not to give the impression that breastfeeding is a fool proof method of contraception)

## Activity 2:Can you see your wife, daughter or daughter in law in this picture?

The main goal of this activity is to explore pregnant and breastfeeding mothers' concerns and anxieties about breastfeeding. Show images of women breastfeeding in different settings. I asked the group if they could see their nursing mother’s breastfeeding in any of these settings. This usually gets the group sharing their feelings about issues such as: breastfeeding in public places, modesty, breastfeeding in front of family and friends, freedom and lifestyle issues.

#### Activity 3: I Can

This activity works well in a group prenatal session. It provides an opportunity to clarify the myths and false information about breastfeeding. Start with a coffee can and cover the label with appropriate paper. Fill the can with positive statements about breastfeeding, beginning with "I can". On the plastic lid of the can write "I Can." Even if theres no can, try to write positive statements on a paper and wrap it, then pass it to your pregnant mothers to pick out a paper and read it out. Discuss any concerns brought up by the statements. For those who can’t write, discuss all we have learnt today with your pregnant mothers verbally. Make some suggestions for the statements like:

- I CAN still have a social life when I nurse my baby.
- I CAN make good milk for my baby even if I eat junk food.
- I CAN nurse my baby even if I need to be away for part of the day.
- I CAN breastfeed my baby even if I get a poor start in the hospital.
- I CAN breastfeed my baby even if I have small breasts.

Source: Doucette, La Leche League International & Peelor, (1983).

#### Activity 4: My Feelings Adaptation

This activity is taught to the significant others so that they can step it down to their prospective nursing mothers to know their feeling about breastfeeding so that their fears can be addressed before the give birth.

Adapt the activity if there are below literacy skills. An envelope is labeled "Breastfeeding Makes Me Feel..." and several possible feelings that could complete the sentence are written on strips of paper and placed inside. When the envelope is circulated, tell your pregnant mother to pull out as much strips as she can and show it to you. The feeling" might not necessarily be "her feeling" but it will give her an opportunity to express her own feeling. Then facilitator/ significant other reads the feeling aloud and the discusses whether or not they share or have overcome that feeling. Feelings included can be both positive and negative such as "confident;" "close to my baby;" "like a good mother;" "gross" or "like a cow."

#### Activity 5: Loss of Freedom: Will Breastfeeding Tie Me Down?

Many women choose to formula feed their babies because they worry that breastfeeding will tie them down. This is a big issue for young mothers, especially if they are returning to work or school.

Significant others can take time to explore breastfeeding promotion pamphlets, posters and videos for pictures that reinforce the idea that breastfeeding mothers are "not tied to the home." Highlight the activities that the mothers are engaged in; most are busy travelling, going to school, out with friends or out in their communities. There are few women dressed in nightgowns in their beds suggesting the need to stay home and breastfeed. This will help pregnant mothers to see that breastfeeding mothers are active in their communities and breastfeeding does not have to "tie a mother down." They significant others are taught to encourage their pregnant mothers to express their breast milk and store at room temperature for four hours, in the refrigerator for four days and in the freezer for about six months (CDC, 2023).

#### Activity 6: Engorgement: a Demonstration With a Balloon!

Many women have difficulty with breastfeeding around the time that their "milk comes in." Occasionally the breasts become "over-full," leading to problems getting the baby to take the breast and sore nipples for the mother. Use a balloon to show the effect of engorgement (an over-full breast) on the ability of the baby to latch on well and drink from the breast. A fully inflated, tight balloon is difficult for the baby to grasp and get a deep mouthful of the breast. The nipple flattens out and is more easily damaged.

Compare the tight balloon with a softer, less full balloon. Show how the softness makes it easier for the baby to take the breast. The areola (darker area surrounding the nipple) should be soft like your cheek, not hard like your forehead when latching the baby onto the breast.

#### Activity 9: The Eating Patterns Game

**One of the most frequent reasons mothers give for stopping breastfeeding early is their feeling that they don't have enough milk.** This game was developed by Linda Smith, a lactation consultant and childbirth educator in Dayton, Ohio. One of the most difficult challenges facing new mothers is their concern about a breastfed baby's need for frequent, unrestricted time at the breast. Often, the baby's frequent feedings are seen by the new mother and her family as a sign that the baby is not getting enough breast milk. The Eating Patterns Game is a fun way to show that even adults feel the urge to eat more often than every four hours. It is an effective way to teach the importance of frequent and baby-led nursing.

**Goal**: To fully appreciate the baby's need for frequent feedings.

Time required: 10-20 minutes

Materials Needed: paper, pencil and a golf ball or tennis ball

How to Play the Game: you are requested to think out about a day you had free access to food, like a buffet having different foods in it, including snacks, fruits and real foods. Then draw yourself and try to measure your weight and average time between each feeding time and imagine how doubled your weight will become if the feeding process is continuous. Then imagine the size of a baby’s stomach (golf ball) as the baby continues to eat on demand so the stomach increases in size and also the baby increases in body weight,

**Evaluation**: Describe any two activities learnt from today’s lessons

**Assignment:** Go home and demonstrate these activities to your pregnant mothers and bring back feedback questions.

**Encounter Four**

**Topic:** Addressing Challenging Issues Relating to Breastfeeding

**The contents of the topic/sub topics**

- Vitamin D supplementation and other vitamin drops
- Baby crying too much,
- Infant formula,
- Common breastfeeding problems and management.

**Instructional materials**: Pictures of some common breastfeeding problems.

### Issue1. Vitamin D Supplementation and other vitamin drops

Vitamin D is a nutrient that helps the body to build and maintain strong bones and teeth. Vitamin D is made by our bodies when our skin is exposed to the sun. Our ability to make enough vitamin D, however, is limited by things like the use of sunscreen, dark skin colour, air pollution, limited sun exposure during cold periods of the months and spending less time outdoors. This is especially true for babies, as we are advised to protect their delicate skin from direct sunlight due to the risk of skin cancer.

Another source of Vitamin D is supplementation. **A daily vitamin D supplement of 10µg (400 IU) is recommended for exclusively and partially breastfed infants, from birth.** A single vitamin D3 supplement (without other vitamins) in a liquid (drop) format is recommended. Examples are wellbaby drops and Abidec drops.

Without a Vitamin D supplement, an infant's vitamin D stores will become low, putting the baby at risk of serious health issues such as **rickets**, a disease that affects bone growth in children.

Non-breastfed babies (that is, infants who are fed only commercial infant formula) do not need a vitamin D supplement because it is added to infant formula, so they get enough from the formula to meet their needs.

### Issue 2. Infant Formula

Pregnant women and their families need to know about the health, nutritional and financial costs of not breastfeeding before deciding how they are going to feed their babies. Breastfeeding remains the key to a healthy mom and baby except in some cases where breastfeeding can be discouraged.

**Issue 3: Baby crying too much**

Baby crying too much during exclusive breastfeeding doesn’t necessarily mean that baby needs to be breastfed, sometimes baby cries because they need attention or may be the baby is not comfortable with the placement position or it could mean that the baby isn’t feeling well and the only way he or she could express himself or herself is to cry to seek attention. Therefore it is the duty of the mother and with your support to ascertain the reason for the baby crying too much.

**Issue 4: Common breastfeeding problems**

- Sore or cracked nipples. Sore nipples usually happen because the baby is not well positioned and attached at the breast. ...
- Not enough breast milk. ...
- Breast engorgement. ...
- Baby is not latching on properly. ...
- Too much breast milk. ...
- Breastfeeding and thrush. ...
- Blocked milk duct. ...
- Mastitis.

## Most common breastfeeding problems

### Sore nipples

**What causes [sore nipples](https://www.whattoexpect.com/first-year/breastfeeding/sore-cracked-painful-nipples-breastfeeding/)?** Soreness is a common reason women throw in the towel on breastfeeding. The good news is that this is often short lived, within a few weeks, your nipples often "toughen up." But if the uncomfortable sensation persists, the most likely cause is a poor latch or a barracuda suck, as well as possibly too high of a setting on a breast pump.

**How to treat sore nipples:** The best treatment is to teach your baby how to latch on properly.  But in the meantime, to allow your nipples to heal, begin nursing with the breast that doesn't have the sore (or as sore) nipple. Let your nipples air dry after feeding, then dab a thin layer of lanolin on them and cover with a nonstick nursing pad.

### Breast engorgement

**What is breast engorgement?**They grew and grew during pregnancy, but just when you thought they couldn't get any bigger your milk came in. About three days after giving birth, your pregnant nursing mother’s breasts will become rock hard as the milk supply goes up so much so that even putting on a bra can hurt. Around two-thirds of all women experience [breast engorgement](https://www.whattoexpect.com/first-year/postpartum-health-and-care/breast-engorgement-postpartum/) those initial days postpartum. This tends to be more of an issue for first-time moms than seasoned ones, possibly because their breasts have been there, done that before, and are better prepared.

**How to treat breast engorgement:**The good news is that breast engorgement only lasts 24 to 48 hours as your nursing mother and baby get into a breastfeeding groove. The worst pain should subside within a couple of days and be virtually gone within a few weeks of breastfeeding. Until then, ease discomfort by nursing frequently, using a warm compress before feeding and a cold compress after, massaging your breasts while feeding, [hand expression](https://www.whattoexpect.com/first-year/breastfeeding/how-to-hand-express-breast-milk/?new), switching up positions and wearing a well-fitting [nursing bra](https://www.whattoexpect.com/baby-products/nursing/best-nursing-bras/).

### Leaking breasts

**What are leaking breasts?**Those first few weeks of nursing are almost always very damp ones, as the milk's supply-and-demand cycle gets up and running. These leaks can spring up anytime, anywhere, but your nursing mother is most likely to leak when she hears or even think about her baby, which can stimulate [letdown](https://www.whattoexpect.com/first-year/breastfeeding/let-down-reflex).

**How to treat leaking breasts:** This problem should get better within four to six weeks, as the baby's milk demands begin matching up with your nursing mothers supply. But while waiting for a dryer day to dawn, advise your nursing mother to wear [nursing pads](https://www.whattoexpect.com/baby-products/nursing-feeding/best-nursing-pads/) (and keep a few extras). Advise her not to use ones with plastic or waterproof liners, as they can cause nipple irritation. Disposables, or washable cotton pads, are better bets. Advise her to wear dark-colored tops or prints, which camouflage milk stains.

She may be tempted to pump to prevent leaking, but this will just stimulate her breasts to make more milk. Once your supply is well-established after the first few weeks, she can try applying pressure to her breasts to stem the tide.

### Clogged milk ducts

**What are clogged milk ducts?** Sometimes a milk duct can become clogged, causing milk to back up and resulting in a red and tender lump. Although a clogged duct itself isn't serious, it can lead to a breast infection if it’s ignored.

**How to treat clogged milk ducts:**Don't give up! Breastfeeding keeps milk flowing, which will eventually [unclog the duct](https://www.whattoexpect.com/plugged-milk-ducts.aspx). In the meantime, advise your nursing mother to apply a warm compress before each feeding, and massage just the lump while nursing. (Massaging more than that can stimulate more milk production) Once the baby is done, drain the affected breast, either manually or with a breast pump. You can tell her that blocked ducts can be prevented by soaking her breasts several times a day in a bath or basin of warm water.

### Mastitis

**What is mastitis?** Mastitis is an [infection of breast tissue](https://www.whattoexpect.com/mastitis.aspx) that causes fever, muscle and breast pain, and redness. It usually occurs when a milk duct gets clogged, and the trapped breast milk gets infected with bacteria from the baby's mouth. Up to 10 percent of all women may experience it, usually within the first six weeks of delivery.

**How to treat mastitis:**advise her to visit the doctor to prescribe antibiotics that will make her feel better quickly. she can (and even encouraged to) continue breastfeeding even while she’s treating the infection. She can also take an Over the Counter (OTC) pain reliever like acetaminophen or ibuprofen, and apply warm compresses to the sore area to relieve pain.

### Thrush

**What is thrush?** If your nursing mothers nipples are pink, burning and/or crusty, it may be due to a yeast infection called [thrush](https://www.whattoexpect.com/first-year/health-and-safety/thrush-in-babies/). While it's not clear why women get thrush, it is typically related to your baby's mouth. Signs of oral thrush include white or yellow irregularly-shaped patches or sores that coat her gums and tongue along with the sides and roof of the mouth.

**How to treat thrush:**If you think your nursing mother may have thrush, see the medical provider. He or she will prescribe a topical antifungal cream or gel, which will kill the yeast. If she uses one, she should wipe any remaining medication off her nipples before nursing, and reapply it right afterwards. If that doesn't work, it probably means that there’s need for her to be put on prescription antifungal pills, which are safe to use while nursing. She should also involve her pediatrician to confirm thrush for her baby and have the treated as well.

### Uneven breasts

**What are uneven or lopsided breasts?**Some babies play favorites with breasts. As a result, you may notice that one starts to look more lopsided than the other. But a breast that's skimped on can become skimpier in milk production, which means there's even less for your baby to snack on.

**How to fix uneven breasts:**Tell her to try to offer her baby the less-favored side first at every feeding. (Although the baby may or may not take the bait once a favorite, it tends to always be a favorite.) she can also try pumping on that one side daily. The good news is once she [wean](https://www.whattoexpect.com/first-year/breastfeeding/weaning/)s, the lopsidedness should go away.

### Milk bleb or blisters

**What are milk blebs or blisters?**These are nipple pores that [become blocked](https://www.whattoexpect.com/first-year/breastfeeding/milk-blebs-blisters-breastfeeding/) when a milk duct becomes clogged. The breast milk becomes thick and hard as a result, this blocks milk flow near the nipple opening. Sometimes, a small amount of skin even grows over the bleb. They're usually a tiny white or yellow spot on the nipple. The skin surrounding it may be red and inflamed, and she may notice severe pinpoint pain while nursing.

**How to treat milk blebs or blisters:**The milk bleb will usually go away on its own within about 48 hours. But to make it vanish faster, you can advise her to apply moist heat like a warm, wet washcloth for 10 to 15 minutes, then nurse her baby. The act of suckling may actually open the blister. Don't try to open the blister yourself because it could become infected. If these steps don't work after about two days, see the doctor, who can use a sterile needle to open the blister and clear it out.

### Low milk supply

**What is low milk supply?**The most common reason moms stop breastfeeding is that they think their baby is [not getting enough milk](https://www.whattoexpect.com/poor-milk-supply-breastfeeding.aspx). That's usually not the case. But if your nursing mother is supplementing with formula, or stretching out the time between feeds, especially with a newborn, the breasts won't be stimulated to produce enough milk. Women who have medical conditions that aren't under control, such as thyroid disease, may also have trouble producing enough milk. The best way to tell if your nursing mother have an adequate milk supply is to monitor the baby's weight. By the time they're around 14 days old, babies should return to their birth weight and start gaining 4 to 7 ounces on average per week. If the baby isn't gaining enough or is losing weight, that's an indication she's not getting enough.

**How to treat low milk supply:**If your nursing mother suspects her baby isn't getting enough milk, she should see a lactation consultant, who can watch as she breastfeeds to check the baby's latch. If that isn't the issue, she can try to feed more often to stimulate more milk production. Make sure your nursing mother is feeding the baby at least eight times per day rather than following a strict schedule. She can also [pump between feedings](https://www.whattoexpect.com/first-year/breastfeeding/power-pumping-to-increase-breast-milk-supply) to stimulate more milk production.

### Oversupply

**What is oversupply?**Believe it or not, you can have too much of a good thing. Some women, especially first-time moms, actually make too much milk. This means that the rush of their milk is so strong that the baby chokes and coughs, which makes it harder for the baby to feed. It can also lead to painful nipples, because the baby may actually bite down to clamp the nipple to stop overflow. The baby may also fuss a lot and seem hungry, even if he/she's constantly eating. This is because he/she can't get the last of the milk in the breast, which has the most calories.

**How to treat oversupply:**If she thinks she has oversupply, let the medical provider know. They can check for a hormonal condition like an over- or under-active thyroid and your meds for potential effects on her hormone levels. In the meantime, she can make it easier for the baby to nurse by holding him/her in an upright position, and use her fingers to reduce the flow of your milk. Let your baby interrupt feedings, and burp her often. Tell her not try to pump, because it can stimulate even more milk production. You can apply cold water or ice to your nipples to decrease leaking.

### Tongue-tie

**What is tongue-tie?**The term is often used to describe someone who's too shy to get words out, but it's also a very real medical condition that affects about four percent of all infants. Known in doctor speak as ankyloglossia, it means that the frenulum the band of tissue that connects the bottom of the tongue to the floor of the mouth is too short and tight. This means your baby can have trouble nursing, since her tongue movements are so restricted.

**How to fix tongue-tie:**A tell-tale sign is a clicking sound when baby nurses as well as trouble latching on and staying latched onto your nipple. If you think your baby might have [tongue-tie](https://www.whattoexpect.com/first-year/health/tongue-tie/), see your pediatrician or lactation consultant, who can diagnose it. A pediatrician or ENT doctor may perform a simple procedure called a frenotomy, where the frenulum is clipped so your baby can move her tongue freely.

### Lip-tie

**What is lip-tie?**It’s similar to a tongue-tie, but less common, and involves the upper lip and gum. The upper lip has a connective tissue attachment called the maxillary labial frenum, and if that's too short and tight, it can restrict the movement of the upper lip, making it hard for a baby to latch on properly.

**How to fix lip-tie:**If you're having trouble nursing but your baby doesn't have a tongue-tie, you can check for a [lip-tie](https://www.whattoexpect.com/first-year/health/lip-tie/) by lifting her upper lip. If it's attached low on the gum, she may have one. Check in with a lactation consultant, who can work with you on specific positional techniques. If that doesn't work, your pediatrician can perform a quick procedure to revise the lip-tie.

**EVALUATION**

- 1. What is a leaking beast?
  2. What is an uneven breast?
  3. Is vitamin D supplement needed for babies who their mothers are practicing EBF?

**Assignment:** Talk to your pregnant mother about all we have discussed and assure her that there’s no cause for alarm in case any of these problems occur during EBF practice. Please remember to support your pregnant mom throughout the pregnancy, delivery and post partum period, most importantly, support and encourage her to practice exclusive breastfeeding.
